# Supplementary material
Source: publisher figshare collection journal article supplement (https://asha.figshare.com/articles/dataset/_/12170331)
Supplement: Supplementary file 1 [file 1]

*Table S1.* Means/proportions and standard errors for Figures 1 and 2.

| y-axis variable          | F1 quintile 1 |               | F1 quintile 2 |               | F1 quintile 3 |               | F1 quintile 4 |               | F1 quintile 5 |               |
|--------------------------|---------------|---------------|---------------|---------------|---------------|---------------|---------------|---------------|---------------|---------------|
|                          | or F2 CR = 0  |               | or F2 CR = 1  |               | or F2 CR = 2  |               | or F2 CR = 3  |               | or F2 CR = 4  |               |
|                          | <i>M</i>      | ( <i>SE</i> ) |
| Fig 1 language           | -0.341        | (.052)        | -0.171        | (.049)        | .002          | (.045)        | .151          | (.046)        | .423          | (.041)        |
| Fig 1 decoding           | -0.396        | (.058)        | -0.185        | (.054)        | .000          | (.051)        | .154          | (.054)        | .415          | (.049)        |
| Fig 1 readcomp           | -0.433        | (.054)        | -0.213        | (.048)        | .058          | (.051)        | .175          | (.049)        | .461          | (.052)        |
| Fig 2a language<br>% low | 5.3           | (.010)        | 12.4          | (.017)        | 16.1          | (.031)        | 20.0          | (.073)        | 60.0          | (.155)        |
| Fig 2a decoding<br>% low | 6.2           | (.010)        | 10.5          | (.016)        | 17.4          | (.031)        | 31.3          | (.082)        | 36.4          | (.145)        |
| Fig 2a readcomp<br>% low | 6.5           | (.009)        | 11.1          | (.015)        | 13.8          | (.026)        | 32.4          | (.077)        | 36.4          | (.145)        |
| Fig 2b language<br>% low | 5.2           | (.009)        | 11.3          | (.017)        | 18.8          | (.033)        | 28.1          | (.079)        | 42.9          | (.187)        |
| Fig 2b decoding<br>% low | 6.2           | (.010)        | 10.1          | (.016)        | 20.5          | (.033)        | 20.6          | (.069)        | 37.5          | (.171)        |
| Fig 2b readcomp<br>% low | 6.9           | (.010)        | 10.3          | (.015)        | 16.0          | (.028)        | 26.8          | (.069)        | 25.0          | (.153)        |
