# Supplementary material
Source: publisher figshare collection journal article supplement (https://asha.figshare.com/articles/dataset/_/12170331)
Supplement: Supplementary file 3 [file 1]

*Table S2.* Correlations ( $\phi$ ) among the five individual risk factors.

|                   | Low maternal education | Family History | Vocab delay at 2 | Vocab delay at 3 | NV cog delay at 2 | NV cog delay at 3 | Low EA3 GPS |
|-------------------|------------------------|----------------|------------------|------------------|-------------------|-------------------|-------------|
| Family History    | .07**                  |                |                  |                  |                   |                   |             |
| Vocab delay at 2  | .00                    | .03            |                  |                  |                   |                   |             |
| Vocab delay at 3  | .08**                  | .06**          | .40**            |                  |                   |                   |             |
| NV cog delay at 2 | .08**                  | .04            | .20**            | .22**            |                   |                   |             |
| NV cog delay at 3 | .08**                  | .07*           | .16**            | .24**            | .22**             |                   |             |
| Low EA3 GPS       | .17**                  | .00            | -.02             | -.03             | .04               | .01               |             |

*Note:* \* $p < .05$ ; \*\* $p < .01$
