# Supplementary material
Source: publisher figshare collection journal article supplement (https://asha.figshare.com/articles/dataset/_/12170331)
Supplement: Supplementary file 6 [file 1]

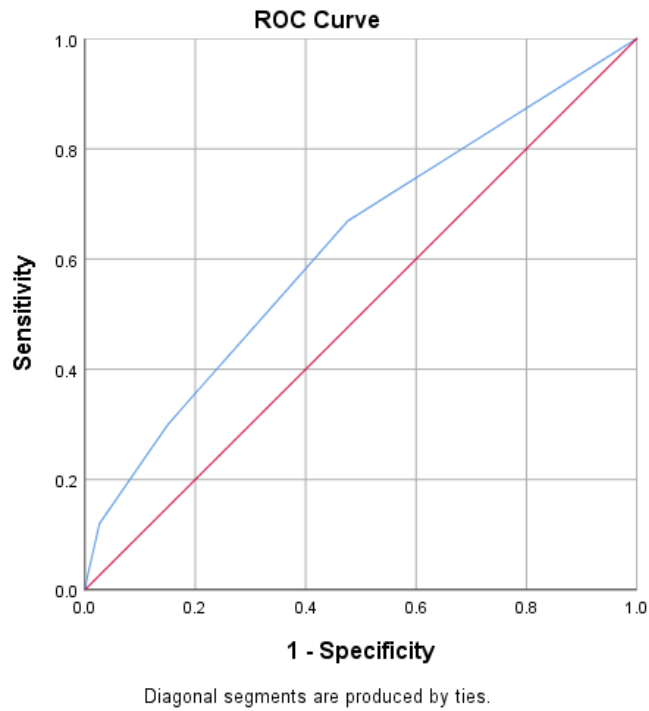

*Figure S5.* ROC curve plotting sensitivity versus specificity for cumulative risk measure at 2 and low reading comprehension at 12. AUC = .623.
