# Supplementary material
Source: publisher figshare collection journal article supplement (https://asha.figshare.com/articles/dataset/_/12170331)
Supplement: Supplementary file 8 [file 1]

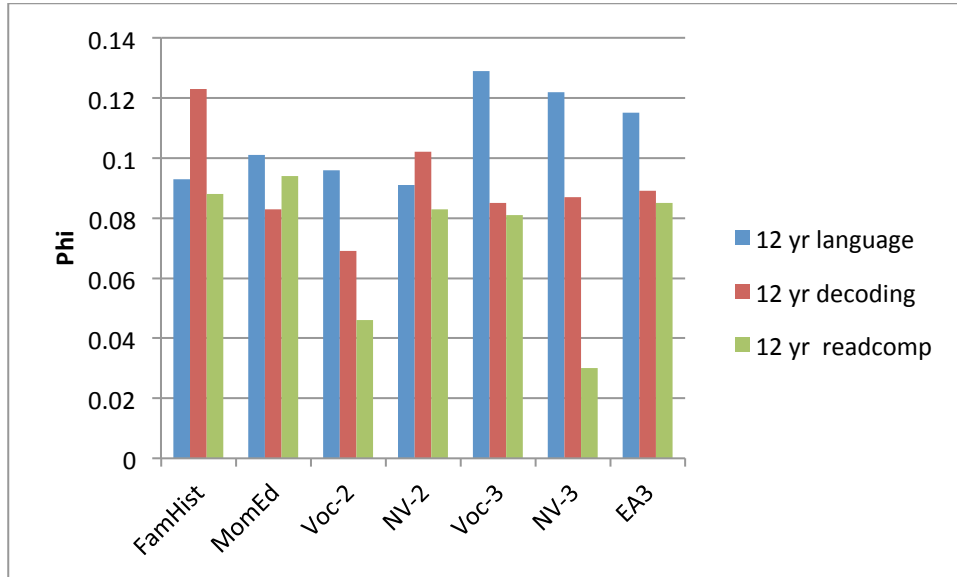

*Figure S2.* Phi coefficients for individual risk factors predicting outcomes at 12. All are significant ( $p < .05$  or better) except from Voc-2 and NV-3 to 12 year reading comprehension.
