# Supplementary material
Source: publisher figshare collection journal article supplement (https://asha.figshare.com/articles/dataset/_/12170331)

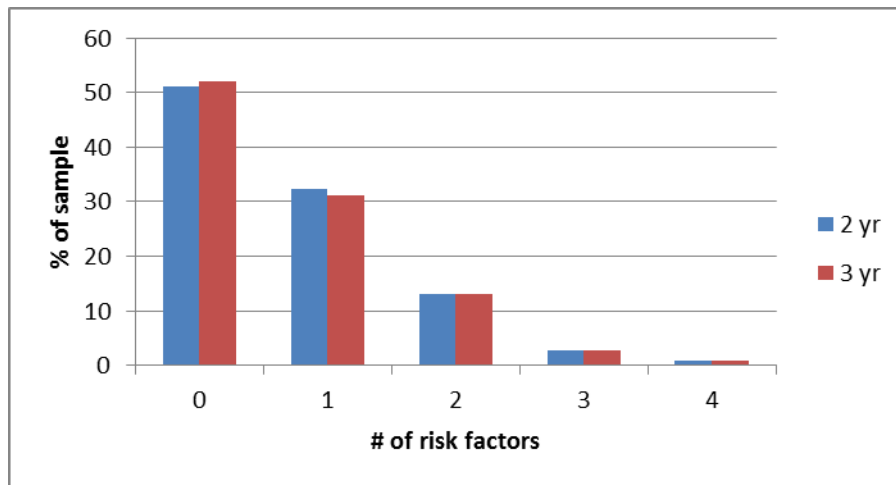

*Figure S1.* Distribution of number of risk factors at ages 2 and 3.

Supplement: Supplementary file 5 [file 1]
